# Supplementary material for: Promotion of Melanoma Cell Proliferation by Cyclic Straining through Regulatory Morphogenesis
Source: MDPI journal article supplement (doi:10.3390/ijms231911884), 2022-10-06
Supplement: s1 [file s1]

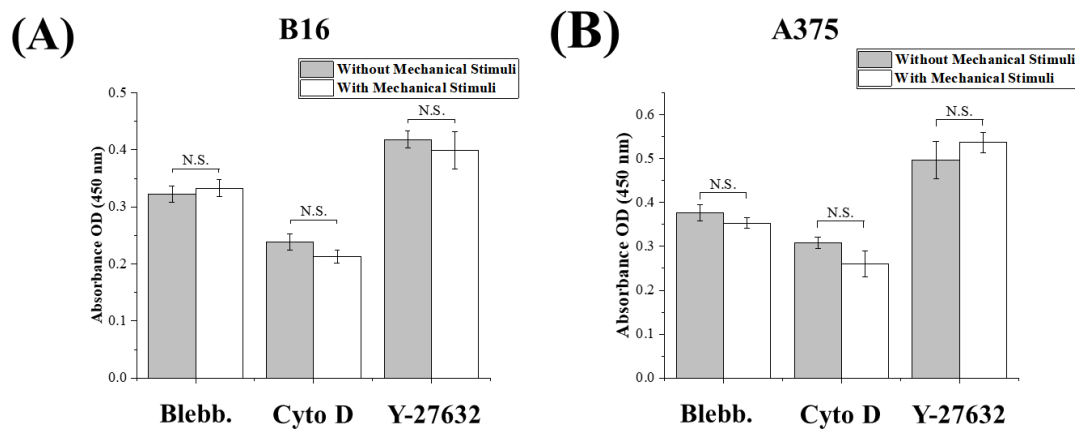

**Figure S1** Influence of cyclic straining and inhibitors on melanoma cells' proliferation. (A) and (B) Quantitative data of melanoma cells' proliferation from CCK-8 assay. Data are presented as means  $\pm$  SDs (n = 3).
